# Supplementary material for: Quantitative Real-Time PCR Analysis of YKL-40 and Its Comparison with Mammalian Chitinase mRNAs in Normal Human Tissues Using a Single Standard DNA
Source: Int J Mol Sci. 2015 Apr 30;16(5):9922–35. doi: 10.3390/ijms16059922 (PMC4463625; doi:10.3390/ijms16059922)
Supplement: Supplementary file 1 [file ijms-16-09922-s001.pdf]

## Supplementary Information

YKL-40\_Fw: GGCTTCTTCTGAGACTGGTGTG  
YKL-40\_Rv: GAACCGCCTGGAATTCC

**Figure S1.** The nucleotide sequences of the real-time PCR primers.

### Mw 976864.4

CATGGAATTCTGGTCTGGGCCATTGATCTGGATGACTTCACTGGCACTTTCTGCAACCA  
GGGCAAGTTTCCCTAATCTCCACCCTGAAGAAAGCCCTCGGCCTGCAGAGTGCAAGTT  
GCACGGCTCCAGCTCAGCCCATGAGCCAATAACTGCTGCTCCAGTGGCAGCGGGAAC  
GGGAGCGGGAGTAGCAGCTCTGGAGGCAGCTCGGGAGGCAGTGGATTCTGTGCTGGCAG  
AGCCAAACGGCCTCTACCCCGTGGCAAATAACAGAAATGCAGATCTGCAGGCCACAGGGG  
CCCAGGAGGATGAGTATGGACAGTTTCTCGTGAAGTGTAAACAGCATTCAGAATCTGCCC  
AGCTTGACCTTCATCATCAATGGTGTGGAGTTCCCTCTGCCACCTTCCTCCTATATCCT  
CAGTAACAACGGCTACTGCACCGTGGGAGTCGAGCCACCTACCTGTCTCTCCAGAACG  
GCCAGCCCTGTGGATCCTCGGGGATGTCTTCCTCAGGTCCTACTATTCGTCTACGAC  
TTGGGCTCGACTCTCTACCAGGAGTTCAATGGCCTGAAGAAGATGAATCCCAAGCTGAA  
GACCCTGTTAGCCATCGGAGGCTGGAATTTAGCACTCAGAAGTTCACAGATATGGTAG  
CCACGGCCAACAACCGTCAGACCTTTGTCAACTCGGCCATCAGGTTTCTGCGCAAATAC  
AGCTTTGACGGCCTTGACCTTGACTGGGAGTACCCAGGAAGCCAGGGGAGCCCTGCCGT  
AGACAAGGAGCGCTTCACAACCCTGGTACAGGACTTGGCCAATGCCTTCAGCAGCTCG  
AGGCCATCAATGACCCCTTCATTGACCTCAACTACATGGTTTACATGTTCCAATATGAT  
TCCACCCATGGCAAATTCCATGGCACCGTCAAGGCTGAGAACGGGAAGCTTGTATCAAT  
TGGAAATCCCATCACCATCTTCCAGGAGCGAGATCCCTCCAAAATCAAGTGGGGCGATG  
CTGGCGCTGAGTACGTCGTGGAGTCCACTGGCGTCTTCACCACCATGGAGAAGGCTGGG  
GCTCATTTGCAGGGGGGAGCCAAAAGGGTCATCATCTCTGCCCCCTCTGCTGATGCCCC  
CAGCGGCCGCATGCAGAAAGGAGTCACTGCCCTGGCACCCAGCACAAATGAAGATCAAGA  
TCATTGCTCCTCTGAGCGCAAGTACTCCGTGTGGATCGGCGGCTCCATCCTGGCCTCG  
CTGTCCACCTTCCAGCAGATGTGGATCAGCAAGCAGGAGTATGACGAGTCCGGCCCCCTC  
CATCGTCCACCGCAAATGCTTCTAGGCGGACTATGACTTAGTTGCGTTACACCCTTTCT  
TGACAAAACCTAACTTGCGCAGAAAAACAAGATGAGATTGCTGCAGTACATGTTGAGGCT  
GGGGGCTCCTGCCAGTAAGCTGGTGTGGGCATCCCCACCTTCGGGAGGAGCTTCACTC  
TGGCTTCTTCTGAGACTGGTGTGAGAGCCCAATCTCAGGACCGGGAATTCCAGGCCGG  
TTCACCAAGGAGGCAGGGACCCTTGCCTACTATGAGAGAATTCCATG

**Figure S2.** Nucleotide sequence of the human Refs/YKL-40 standard DNA. The human Refs/YKL-40 standard DNA (1581 nucleotides long) contained six cDNA fragments (shown in different colors) that covered the PCR target regions (shown in bold and underlined) and 44–143 nucleotides of the flanking regions and contained the BglII, Sall, XhoI, NotI and PstI restriction sites (shown in bold and italics).

**MW 926,190.6**

GTTTTCCCAGTCACGACGTTGTAAAAACGACGGCCAGTGAATTGTAATACGACTCACTAT  
 AGGGCGAATTGGGCCCCGACGTCGCATGCTCCCGGCCGCCATGGCGGCCGCGGAATTCTG  
 ATTCATGGGATCCCCTGTCTAGGTAGCTGGCACCAGGAGCCGTGGGCAAGGGAAGAGGC  
 CACACCCTGCCCTGCTCTGCTGCAGCCAG**ATG**GGTGTGAAGGCGTCTCAAACAGGCTTT  
GTGGTCCTGGTGCTGCTCCAGTGCTGCTCTGCATACAACTGGTCTGCTACTACACCAG  
CTGGTCCCAGTACCGGGAAGGCGATGGGAGCTGCTTCCCAGATGCCCTTGACCGCTTCC  
TCTGTACCCACATCATCTACAGCTTTGCCAATATAAGCAACGATCACATCGACACCTGG  
GAGTGGAAATGATGTGACGCTCTACGGCATGCTCAACACACTCAAGAACAGGAACCCCAA  
CCTGAAGACTCTCTTGTCTGTCTGCGAGGATGGAACCTTGGGTCTCAAAGATTTTCCAAGA  
TAGCCTCCAACACCCAGAGTCGCCGGACTTTCATCAAGTCAGTACCGCCATTTCTGCGC  
ACCCATGGCTTTGATGGGCTGGACCTTGCTGGCTCTACCCTGGACGGAGAGACAAACA  
GCATTTTACCACCCTAATCAAGGAAATGAAGGCCGAATTTATAAAGGAAGCCCAGCCAG  
GGAAAAAGCAGCTCCTGCTCAGCGCAGCACTGTCTGCGGGGAAGGTCACCATTGACAGC  
AGCTATGACATTGCCAAGATATCCCAACACCTGGATTTTATTAGCATCATGACCTACGA  
TTTTTCATGGAGCCTGGCGTGGGACCACAGGCCATCACAGTCCCCTGTTCCGAGGTGAGG  
AGGATGCAAGTCCTGACAGATTGAGCAACACTGACTATGCTGTGGGGTACATGTTGAGG  
CTGGGGGCTCCTGCCAGTAAGCTGGTGATGGGCATCCCCACCTTCGGGAGGAGCTTCAC  
TCTGGCTTCTTCTGAGACTGGTGTTGGAGCCCCAATCTCAGGACCGGGAATTCCAGGCC  
GGTTCACCAAGGAGGCAGGGACCTTGCTTACTATGAGATCTGTGACTTCCTCCGCGGA  
GCCACAGTCCATAGAATCCTCGGCCAGCAGGTCCCCTATGCCACCAAGGGCAACCAGTG  
GGTAGGATACGACGACCAGGAAAGCGTCAAAAGCAAGGTGCAGTACCTGAAGGACAGGC  
AGCTGGCGGGCGCCATGGTATGGGCCCTGGACCTGGATGACTTCCAGGGCTCCTTCTGC  
GGCCAGGATCTGCGCTTCCCTCTACCAATGCCATCAAGGATGCACTCGCTGCAACGGC  
TGAGAGTCAAATCACTAGTGAATTCGCGGCCGCTGCAGGTCGACCATATGGGAGAGCT  
CCCAACGCGTTGGATGCATAGCTTGAGTATTCTATAGTGTACCTAAATAGCTTGGCGT  
 AATCATGGTCATAGCTGTTTCCTG

**Figure S3.** Nucleotide sequence and calculated molecular weight of YKL-40 open reading frame. ATG start codon is highlighted in bold. Open reading frame of YKL-40 is shown underlined.

PstI\_YKL-40\_Fw: **TGACCTGCAGT**TACATGTTGAGGCTGGGGGCTCCTG  
 Quant\_YKL-40\_Rv: CATGGAATTCTCTCATAGTAGGCAAGGGTCCCTGC  
 Quant\_Human\_AMCase\_Fw: CATGGAATTCTGGTCTGGGCCATTGATCTGGATGA  
 PstI\_Human\_actin\_Rv: **TGACCTGCAGCAAT**CTCATCTTGTCTTCTGCGCAA

**Figure S4.** Forward and reverse primers used to construct the standard template DNA. The primers contains the PstI recognition sequence (underlined) and the 4 bases-long extra nucleotides (boldfaced) to efficiently cleave close to the end of the amplified cDNAs by PstI.

Entire YKL-40\_Fw: CATGGGATCCCCTGTCTAGGTAGCTGGCACCAGGA  
 Entire YKL-40\_Rv: TGACCTCGAGCCGTTGCAGCGAGTGCATCCTTGAT  
 M13\_Fw: GTTTTCCCAGTCACGAC  
 M13\_Rv: CAGGAAACAGCTATGAC

**Figure S5.** Primers for amplifying entire coding cDNAs by PCR.
